# Supplementary material for: Sequencing-based Spatial Transcriptomics with High Sensitivity
Source: Research Square preprint supplement (doi:10.21203/rs.3.rs-7337510/v1), 2025-09-03
Supplement: Supplementary file 2 [file e8f7ddc0ffb9fc51174e68da.xlsx]

## Sheet: Sheet1
Number of slide-seq cell-cell communication
	Elongating	Endothelial	InnateLymph	Leydig	Macrophage	Myoid	Scytes	Sertoli	SPG	STids	Unknown
Elongating	0	0	0	0	0	0	0	0	0	0	0
Endothelial	0	0	0	0	0	0	0	0	0	0	0
InnateLymph	0	0	0	0	0	0	0	0	0	0	0
Leydig	0	0	0	0	0	0	0	0	0	0	0
Macrophage	0	0	0	0	0	0	0	0	0	0	0
Myoid	0	0	0	0	0	0	0	0	0	0	0
Scytes	0	0	0	0	0	0	0	0	0	0	0
Sertoli	0	0	0	0	0	0	0	1	0	0	0
SPG	0	0	0	0	0	0	0	0	0	0	0
STids	0	0	0	0	0	0	0	0	0	0	0
Unknown	0	0	0	0	0	0	0	0	0	0	0
Number of SalusSTS cell-cell communucation
	Elongating	Endothelial	Leydig	Macrophage	Myoid	Scytes	Sertoli	SPG	STids	Unknown
Elongating	14	0	45	0	0	14	37	0	20	0
Endothelial	0	145	89	0	0	49	66	0	68	0
Leydig	39	80	87	0	0	41	55	49	62	89
Macrophage	0	0	0	0	0	0	0	0	0	0
Myoid	0	0	0	0	0	0	0	0	0	0
Scytes	5	56	58	0	0	46	44	38	22	73
Sertoli	47	88	92	0	0	51	101	61	71	106
SPG	0	0	73	0	0	41	55	75	54	85
STids	8	47	44	0	0	14	38	30	41	55
Unknown	0	0	120	0	0	62	83	76	80	153
