# Supplementary material for: Sequencing-based Spatial Transcriptomics with High Sensitivity
Source: Research Square preprint supplement (doi:10.21203/rs.3.rs-7337510/v1), 2025-09-03
Supplement: Supplementary file 3 [file e947449a70a562fb2f1c614e.xlsx]

## Sheet: Sheet1
Downsampling rate	1	0.8	0.4	0.2	0.1	0.05
Mean UMI counts	14187	11349	5675	2837	1418	709
DEG Number Cluster
0	115	87	38	19	8	2
1	700	621	437	295	167	77
2	48	37	10	0	0	0
3	42	31	4	0	0	0
4	4831	4658	3924	2879	1693	825
5	4250	4028	3214	2398	1497	747
6	5137	4941	4235	3284	2186	1186
7	6622	6396	5564	4664	3679	2601
8	4862	4664	3967	2946	1722	701
9	3817	3613	3098	2480	1873	1342
10	5093	4896	4135	3066	1736	652
11	5828	5664	5083	4337	3386	2360
12	76	61	29	13	2	1
13	3422	3292	2794	2245	1722	1220
14	5631	5386	4599	3730	2865	1983
15	5088	4832	4020	3156	2333	1540
16	2307	2135	1529	890	426	160
17	2637	2370	1488	761	316	117
18	1406	1267	851	551	354	221
19	0	0	0	0	0	0
sum	61912	58979	49019	37714	25965	15735
